# Supplementary material for: Financial Implications of Short Stay Pediatric Hospitalizations
Source: Oxford University Press journal article supplement (doi:10.1542/peds.2021-052907), 2022-03-31
Supplement: peds_2021052907supplementarydata.pdf [file peds_2021052907supplementarydata.pdf]

## Supplemental Information

**SUPPLEMENTAL TABLE 3** Top 10 Diagnoses Represented in Inpatient and Observation Cohorts

|             | Diagnosis                                                   | <i>n</i> | %   |
|-------------|-------------------------------------------------------------|----------|-----|
| Inpatient   |                                                             |          |     |
| 1           | Asthma                                                      | 4479     | 8.3 |
| 2           | Seizure                                                     | 4256     | 7.9 |
| 3           | Bronchiolitis and respiratory syncytial virus pneumonia     | 4130     | 7.7 |
| 4           | Pneumonia NEC                                               | 2716     | 5.0 |
| 5           | Infections of upper respiratory tract                       | 2628     | 4.9 |
| 6           | Diabetes                                                    | 2583     | 4.8 |
| 7           | Nonbacterial gastroenteritis with nausea and vomiting       | 1877     | 3.5 |
| 8           | Cellulitis and other bacterial skin infections              | 1622     | 3.0 |
| 9           | Chemotherapy                                                | 1575     | 2.9 |
| 10          | Pulmonary edema and respiratory failure                     | 1452     | 2.7 |
| Observation |                                                             |          |     |
| 1           | Seizure                                                     | 6286     | 8.9 |
| 2           | Bronchiolitis and respiratory syncytial virus pneumonia     | 4856     | 6.8 |
| 3           | Asthma                                                      | 4505     | 6.3 |
| 4           | Infections of upper respiratory tract                       | 4319     | 6.1 |
| 5           | Nonbacterial gastroenteritis w nausea and vomiting          | 3614     | 5.1 |
| 6           | Other digestive system diagnoses                            | 3163     | 4.5 |
| 7           | Hypovolemia and related electrolyte disorders               | 2328     | 3.3 |
| 8           | Signs, symptoms and other factors influencing health status | 1930     | 2.7 |
| 9           | Pneumonia not elsewhere classified                          | 1923     | 2.7 |
| 10          | Cellulitis and other bacterial skin infections              | 1729     | 2.4 |

**SUPPLEMENTAL TABLE 4** Aggregated Cost Coverage Ratios for Inpatient and Observation Status Stays by Hospital Reflected in Figure 2.

| Hospital | Overall       |               | Public Payer  |               | Nonpublic Payer |               |
|----------|---------------|---------------|---------------|---------------|-----------------|---------------|
|          | IP [IQR]      | OBS [IQR]     | IP            | OBS           | IP              | OBS           |
| 1        | 1.2 [0.2–2.5] | 0.5 [0.2–1.1] | 0.9 [0.2–2.1] | 0.3 [0.1–0.8] | 1.5 [0.3–2.7]   | 0.6 [0.2–1.3] |
| 2        | 2.0 [1.2–2.6] | 1.3 [0.8–1.8] | 1.5 [0.8–2.6] | 1.1 [0.7–1.4] | 2.2 [1.7–2.6]   | 2.0 [1.4–2.4] |
| 3        | 1.8 [1.1–2.3] | 0.6 [0.2–2.1] | 1.4 [0.9–1.9] | 0.2 [0.1–0.3] | 2.0 [1.6–2.5]   | 2.1 [1.6–2.4] |
| 4        | 2.8 [2.1–4.4] | 1.9 [0.8–2.9] | 2.4 [1.9–3.1] | 1.5 [0.5–2.5] | 3.9 [2.6–6.1]   | 2.5 [1.4–3.5] |
| 5        | 1.5 [1.0–2.1] | 0.8 [0.5–1.4] | 1.7 [1.1–2.6] | 0.6 [0.5–0.8] | 1.3 [1.0–1.7]   | 1.3 [0.9–1.7] |
| 6        | 1.5 [0.8–2.1] | 0.8 [0.5–1.6] | 1.1 [0.6–1.7] | 0.6 [0.5–0.8] | 1.8 [1.3–2.2]   | 1.7 [1.2–2.1] |
| 7        | 1.0 [0.0–1.6] | 1.0 [0.0–1.6] | 0.4 [0.0–1.0] | 0.1 [0.0–1.1] | 1.5 [1.1–1.9]   | 1.5 [1.0–1.8] |
| 8        | 1.4 [0.6–3.1] | 0.7 [0.4–1.4] | 1.1 [0.6–2.1] | 0.6 [0.3–0.8] | 2.0 [0.7–3.8]   | 1.1 [0.5–1.9] |
| 9        | 1.4 [0.9–2.2] | 1.1 [0.3–2.4] | 1.1 [0.8–1.6] | 0.3 [0.2–0.6] | 1.8 [1.1–2.6]   | 2.2 [1.4–2.8] |
| 10       | 1.6 [0.4–2.5] | 0.4 [0.2–1.1] | 1.4 [0.3–2.3] | 0.3 [0.2–0.5] | 2.0 [0.8–2.8]   | 1.9 [1.1–2.6] |
| 11       | 1.0 [0.8–1.1] | 0.9 [0.9–0.9] | 0.9 [0.5–1.0] | 0.9 [0.9–0.9] | 1.3 [1.0–1.5]   | 0.8 [0.5–1.3] |
| 12       | 1.2 [0.7–1.5] | 0.4 [0.1–1.3] | 0.8 [0.6–1.0] | 0.1 [0.1–0.2] | 1.5 [1.2–1.7]   | 1.3 [1.0–1.7] |
| 13       | 1.8 [1.3–2.3] | 1.1 [0.6–1.8] | 1.6 [1.1–2.1] | 0.8 [0.5–1.1] | 2.0 [1.5–2.5]   | 2.2 [1.2–2.7] |
| 14       | 0.9 [0.6–1.6] | 1.1 [0.4–1.8] | 0.8 [0.5–1.3] | 0.2 [0.1–0.5] | 1.4 [0.9–2.0]   | 1.6 [1.1–2.0] |
| 15       | 2.1 [1.3–3.0] | 0.6 [0.3–1.1] | 2.1 [1.3–3.1] | 0.5 [0.3–0.9] | 2.2 [1.3–3.0]   | 1.2 [0.6–1.9] |
| Overall  | 1.4 [0.7–2.4] | 0.9 [0.3–1.7] | 1.1 [0.6–2.1] | 0.6 [0.2–0.9] | 1.7 [1.0–2.6]   | 1.6 [0.8–2.3] |

All overall comparisons  $\leq 0.001$  except hospital 7 ( $P = .800$ ) and hospital 14 ( $P = .474$ ). All public payer comparisons  $\leq 0.001$  except hospital 7 ( $P = .888$ ). All nonpublic payer comparisons  $\leq 0.03$  except hospital 3 ( $P = .464$ ), hospital 10 ( $P = .368$ ), and hospital 13 ( $P = .128$ ). Cost coverage ratio  $< 1.0$  indicates costs exceed reimbursement.
